# Supplementary material
Source: PubMed Central journal article supplement (PMC10227752)
Supplement: freeneuropathol-02-17-3341-s001.pdf [file freeneuropathol-02-17-3341-s001.pdf]

## **The neurovascular unit in diffuse intrinsic pontine gliomas**

### ***Supplementary material – Free Neuropathology***

Fatma E. El-Khouly <sup>1,2\*</sup>, Rianne Haumann <sup>1,2\*</sup>, Marjolein Breur <sup>3</sup>, Sophie E.M. Veldhuijzen van Zanten <sup>1,2</sup>,  
Gertjan J.L. Kaspers <sup>1,2</sup>, N. Harry Hendrikse <sup>4,5</sup>, Esther Hulleman <sup>1,2</sup>, Dannis G. van Vuurden <sup>1,2#</sup>, Marianna  
Bugiani <sup>3#</sup>

<sup>1</sup> Emma Children's Hospital, Amsterdam UMC – location VUmc, Department of Pediatric Oncology,  
Cancer Center Amsterdam, de Boelelaan 1117, Amsterdam, The Netherlands

<sup>2</sup> Princess Máxima Center for Pediatric Oncology, Utrecht, The Netherlands

<sup>3</sup> Amsterdam UMC – location VUmc, Department of Pathology, de Boelelaan 1117, Amsterdam, The  
Netherlands

<sup>4</sup> Amsterdam UMC – location VUmc, Department of Clinical Pharmacology & Pharmacy, de Boelelaan  
1117, Amsterdam, The Netherlands

<sup>5</sup> Amsterdam UMC – location VUmc, Department of Radiology & Nuclear Medicine, de Boelelaan 1117,  
Amsterdam, The Netherlands

\* Co-first authorship

# Co-last authorship

**Supplementary Table 1: Characteristics of age-matched healthy controls.**

| <b>Case</b> | <b>Gender</b> | <b>Age (y)</b> |
|-------------|---------------|----------------|
| 1           | M             | 1              |
| 2           | M             | 2              |
| 3           | F             | 2              |
| 4           | M             | 2              |
| 5           | M             | 2              |
| 6           | M             | 2              |
| 7           | M             | 2              |
| 8           | F             | 3              |
| 9           | F             | 3              |
| 10          | M             | 6              |
| 11          | M             | 8              |
| 12          | M             | 12             |
| 13          | F             | 13             |
| 14          | M             | 13             |
| 15          | F             | 14             |
| 16          | F             | 16             |
| 17          | M             | 18             |
| 18          | M             | 19             |
| 19          | F             | 13             |
| 20          | M             | 17             |

*F: female; M: male; y: years*
